# Supplementary material for: Characteristics of chemical products under the NOx mode of dielectric barrier discharge: comprehensive effects of specific energy input and magnetic field
Source: Royal Society of Chemistry journal article supplement (doi:10.1039/d4cp03627a), 2025-01-01
Supplement: d4cp03627a1.pdf [file d4cp03627a1.pdf]

## Supporting Information

### Characteristics of chemical products under NO<sub>x</sub> mode of dielectric barrier discharge: comprehensive effects of specific energy input and magnetic field

Kun Liu,\* Jing Dai, and Xiong-Feng Zhou

*State Key Laboratory of Power Transmission Equipment Technology, School of Electrical Engineering, Chongqing University, Chongqing 400044, People's Republic of China.*

\*Authors to whom correspondence should be addressed: liukun@cqu.edu.cn (Kun Liu)

#### S1. Calibration curve for 4-nitrosophenol

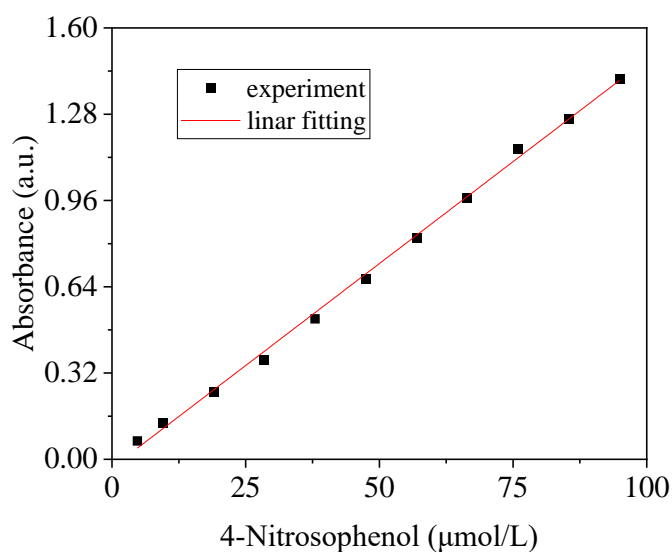

**Figure S1** The absorbance versus concentration of 4-nitrosophenol at 397 nm.

#### S2. Electrical characteristics of discharge

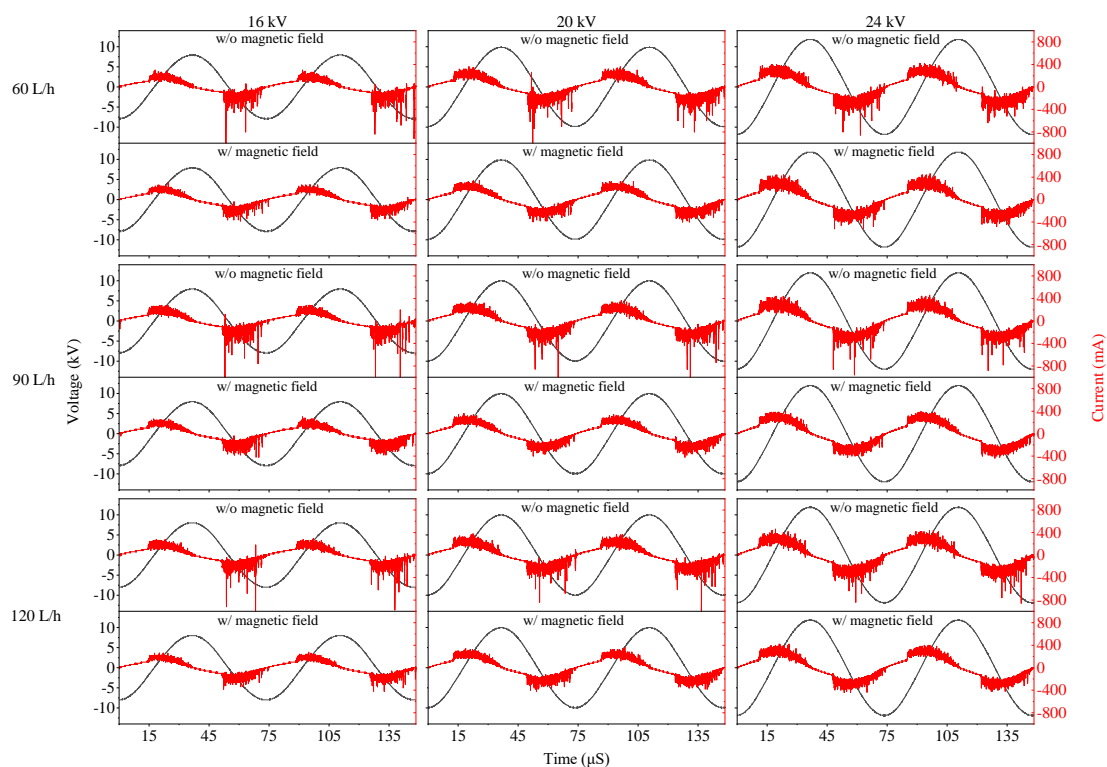

**Figure S2** Variation of voltage and current waveforms under different voltages and gas flow rates with and without the magnetic field.

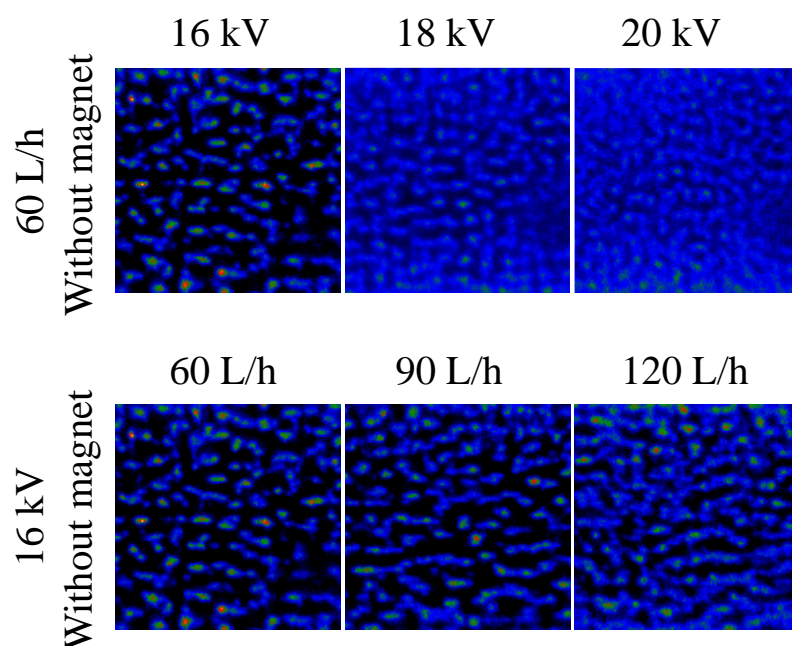

**Figure S3** Variation of discharge image under different voltages and gas flow rates.
